# Supplementary material for: Untangling multi-species fisheries data with species distribution models
Source: Springer Nature journal article supplement (doi:10.1007/s11160-024-09863-1), 2024-05-15
Supplement: MOESM1 [file 11160_2024_9863_MOESM1_ESM.docx]

Supplementary Material

**Untangling multi-species fisheries data with species distribution models**

Matthew N. McMillan1*, Susannah M. Leahy1, Kyle B. Hillcoat1, Montana Wickens1, Eric M. Roberts2, James J. Daniell2

1Queensland Department of Agriculture and Fisheries, Brisbane, QLD, Australia

2Earth and Environmental Sciences, James Cook University, Townsville, QLD, Australia

* Corresponding author

**Table S1**. Sources of sediment survey data used as inputs for habitat modelling. M/G/S = mud, gravel, and sand; CaCO3 = calcium carbonate.

| **Survey** | **M/G/S** | **CaCO3** | **Source** |
| --- | --- | --- | --- |
| Various | 4,725 | 3,459 | MARS (Matthews 2007) |
| FRDC Project 2017-048 | 166 | 165 | Courtney et al. (2021) |
| Hervey Bay Coast | 721** | 0 | Stephens et al. (1988) |
| Hervey Bay and its Estuaries | 47 | 0 | Ribbe (2014) |
| Southern Great Barrier Reef | 158 | 310 | Maxwell and Maiklem (1964) |
| Great Sand Strait | 85 | 0 | Tarabbia (1990) |
| GBR Banks | 0 | 1,605 | Harris et al. (2013) |
| Burdekin Region | 215 | 215 | Belperio (1978) |
| Townsville bug survey | 132 | 132 | Louw et al. (In review) |
| Bowen/Princess Charlotte Bay | 314 | 307 | Frankel (PhD thesis) |
| Hinchinbrook and Halifax Bay | 131 | 131 | Orpin (PhD thesis) |
| Northern GBR Reefs | 67 | 67 | Flood Orme Scoffin (1978) |
| **Total** | **6,761** | **5,851** |  |

**Table S2**. Covariates used in the modelling of sediment properties.

| **Covariate description** | **Source** |
| --- | --- |
| Bathymetry (m) | Beaman (2010) |
| Aspect (degrees) | “ “ |
| Slope (degrees) | “ “ |
| Standard Deviation of bathymetry within a 3x3 kernel (100 m resolution) | “ “ |
| Standard Deviation of bathymetry within a 3x3 kernel (1,000 m res.) | “ “ |
| Topographic position index within a 3x3 kernel (100 m res.) | “ “ |
| Topographic position index within a 3x3 kernel (1,000 m res.) | “ “ |
| Binary ‘bank’ or ‘not-bank’ raster | Harris et al. (2013) |
| Distance from banks (kilometres) | “ “ |
| Average significant wave height (m) | Steven et al. (2019) |
| Average significant wave direction (degrees) | “ “ |
| Average significant wave stress | “ “ |
| Maximum current velocity (m/s) | “ “ |
| Maximum current direction (degrees) | “ “ |
| Average current velocity (m/s) | “ “ |
| Average current direction (degrees) | “ “ |
| Major axis of the current ellipse | “ “ |
| Minor axis of the current ellipse | “ “ |
| Eccentricity of the current ellipse | “ “ |
| Orientation of the current ellipse (degrees) | “ “ |
| Latitude (degrees) | N/a |
| Longitude (degrees) | N/a |
| Distance from the coast (kilometres) | N/a |
| Distance from the continental shelf (using 200 m depth contour) | N/a |

**Table S3**. Results of Variance Explained by cross validation (VEcv) for sediment parameters modelled for use as predictor variables in *Thenus* species distribution models.

| **Sediment parameter** | **VEcv score** | **VEcv rating** |
| --- | --- | --- |
| Mud content | **63.5** | Good |
| Sand content | **52.7** | Good |
| Gravel content | **31.9** | Moderate |
| CaCO3 | **85.9** | Excellent |
| Mean grain size | **57.4** | Good |
| Very fine sand | **38.6** | Moderate |
| Fine sand | **34.2** | Moderate |
| Medium sand | **33.6** | Moderate |
| Coarse sand | **40.9** | Moderate |
| Very coarse sand | **32.2** | Moderate |
| Grain size St. Dev. | **37.3** | Moderate |
| Trask sorting coeff. | **23.5** | Poor |

**Table S4.** Raster variables trialled as predictors in modelling of *Thenus* species distributions.

| **Variable** | **Description** | **Source** |
| --- | --- | --- |
| Bathymetry | Depth to the seabed in meters | Beaman (2010) |
| Maximum current | Maximum tidal current (knots) | Steven et al. (2019) |
| Distance from coast | Distance from the mainland (nm) | This study |
| Mean grain size | Sediment mean grainsize in Phi units | “ “ |
| Sediment SD | Standard deviation of sediment grainsize | “ “ |
| Mud fraction | Percent mud (<0.063mm) in sediment profile | “ “ |
| Very fine sand fraction | Percent very fine sand (0.63mm–0.125mm) | “ “ |
| Fine sand fraction | Percent fine sand (0.125mm–0.25mm) | “ “ |
| Medium sand fraction | Percent medium sand (0.25mm–0.5mm) | “ “ |
| Coarse sand fraction | Percent coarse sand (0.5mm–1mm) | “ “ |
| Very coarse sand fraction | Percent very coarse sand (1mm–2mm) | “ “ |
| Gravel fraction | Percent gravel (>2mm) | “ “ |
| Calcium carbonate | Percent CaCO3 in sediment | “ “ |
